# Supplementary material
Source: MDPI journal article supplement (https://www.mdpi.com/2311-5637/10/5/248)
Supplement: s1 [file s1]

## **Supplementary Materials**

### **Biohydrogen production under aerial conditions by a nitrogen-fixing bacterium isolated from a steel signboard**

Nobuhiro Aburai <sup>1\*</sup>, Honami Tanaka<sup>1</sup>, Hana Kohira<sup>1</sup>, Tinami Sekine<sup>1</sup>

<sup>1</sup>Department of Chemistry and Life Science, School of Advanced Engineering,  
Kogakuin University, 2665-1 Nakano-machi, Hachioji, Tokyo 192-0015, Japan

\*Corresponding author (N. Aburai)

E-mail address: [bt13347@ns.kogakuin.ac.jp](mailto:bt13347@ns.kogakuin.ac.jp) (N. Aburai)

Tel.: +81 42 628 4847

FAX: +81 42 628 5647

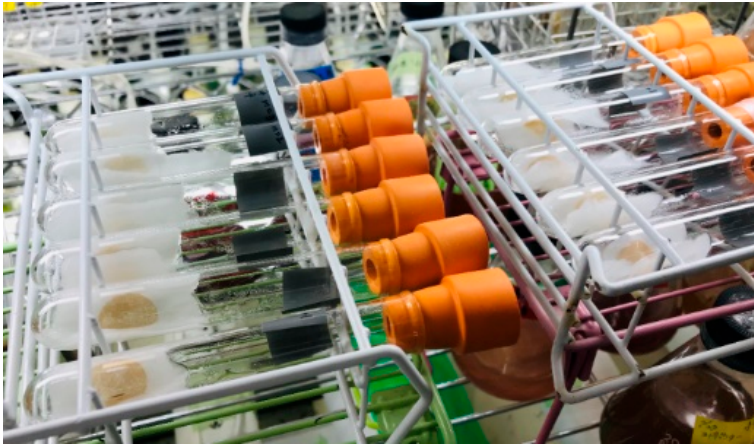

**Figure S1.** Photograph of biofilms under aerial culture conditions seen from an angle.

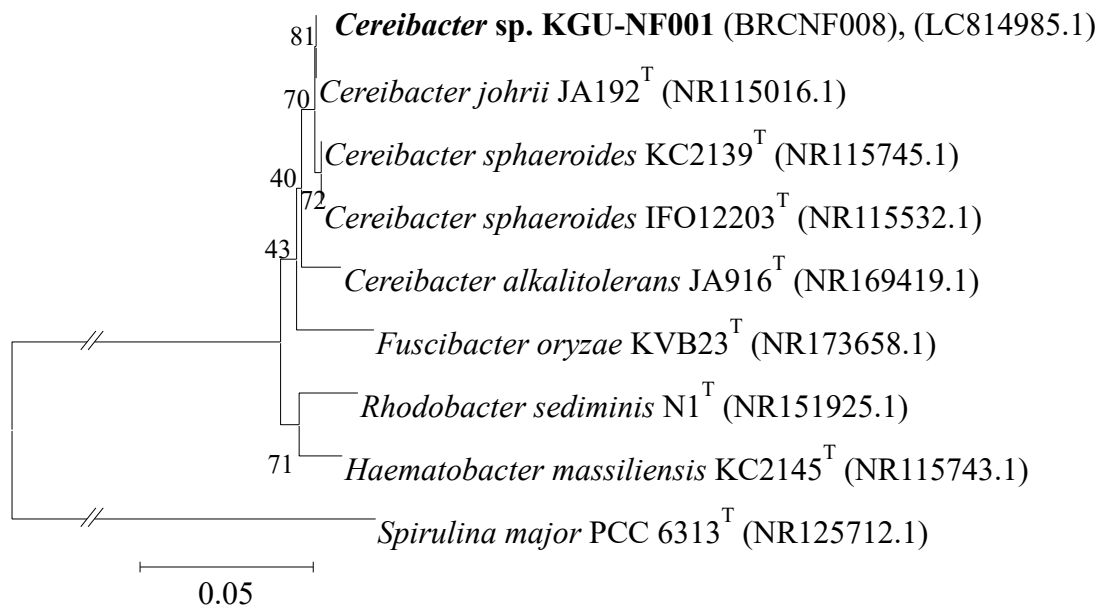

**Figure S2.** Phylogenetic tree of the isolated bacteria with its known neighbors based on 16S rRNA gene sequences constructed using the neighbor-joining method. The scale bar represents an evolutionary distance (Knuc) of 0.05. Numbers at branch nodes are bootstrap values (1000 replicates) obtained using the maximum-likelihood method. Accession numbers for DNA sequences are indicated in parentheses. <sup>T</sup> is type strain.
